# Supplementary material for: Ionic liquid crystals based on amino acids and gemini surfactants: tunable phase structure, circularly polarized luminescence and emission color
Source: Royal Society of Chemistry journal article supplement (doi:10.1039/d1tc05265a), 2021-12-25
Supplement: d1tc05265a1.pdf [file d1tc05265a1.pdf]

**Electronic Supplementary Material (ESI) for *J. Mater. Chem. C***

**This journal is © The Royal Society of Chemistry 2015**

**Ionic Liquid Crystalline Based on Amino Acid and Gemini Surfactant:  
Tunable Phase Structure, Circularly Polarized Luminescence and  
Emission Color**

Mengjiao Yi,<sup>a</sup> Ping Qi,<sup>a</sup> Qi Fan<sup>a</sup> and Jingcheng Hao<sup>\*a</sup>

<sup>a</sup> Key Laboratory of Colloid and Interface Chemistry (Ministry of Education) & State Key Laboratory of Crystal Materials, Shandong University, Jinan 250100, P.R. China. E-mail: [jhao@sdu.edu.cn](mailto:jhao@sdu.edu.cn)

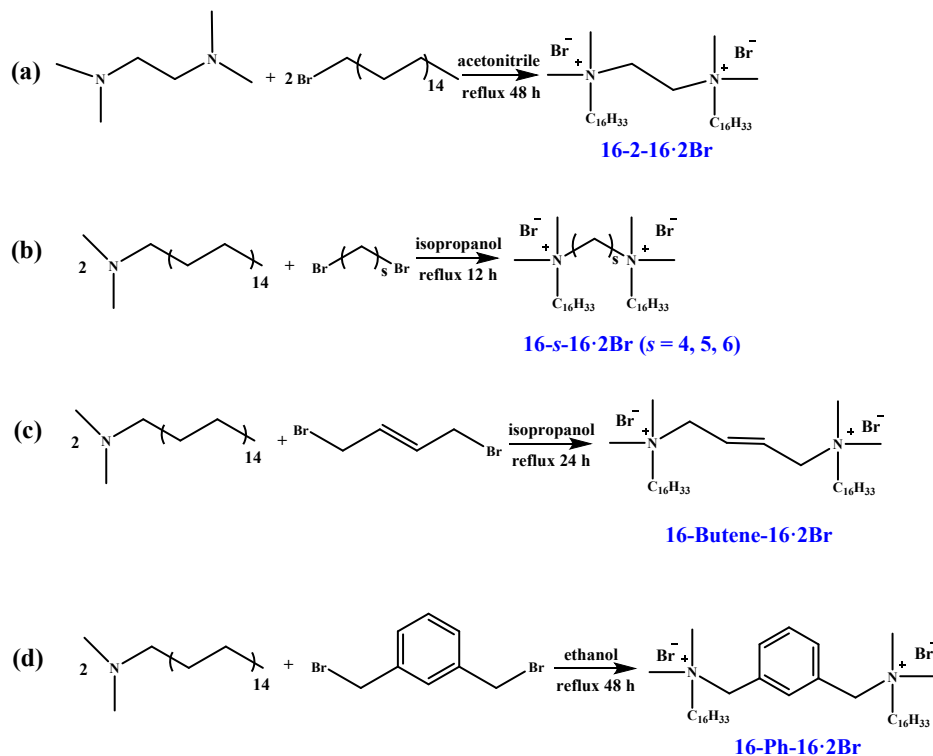

Figure S1. Synthesis routes and abbreviations of Gemini surfactants.

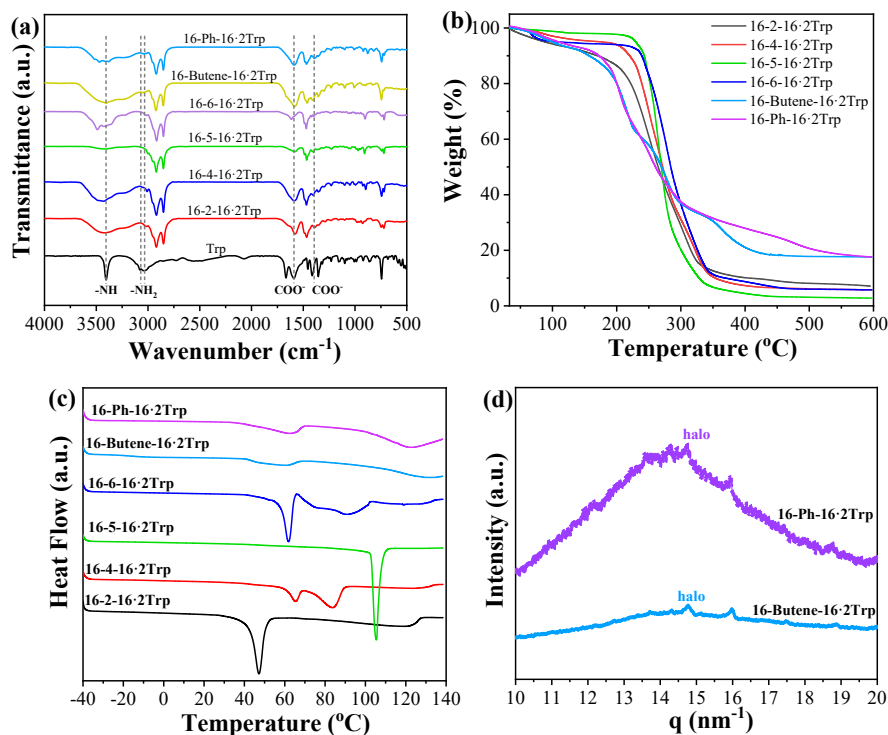

Figure S2. (a) FT-IR spectra, (b) TGA curve, and (c) DSC thermogram of luminescent complexes. (d) WAXS pattern of 16-Butene-16-2Trp, and 16-Ph-16-2Trp ILCs.

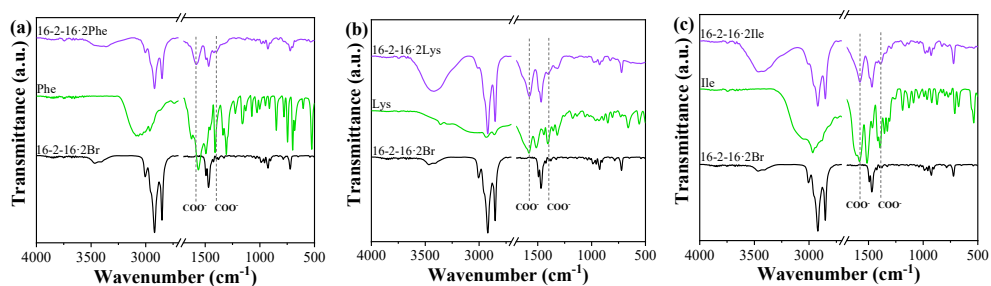

Figure S3. FT-IR spectra of natural amino acids and corresponding complexes.

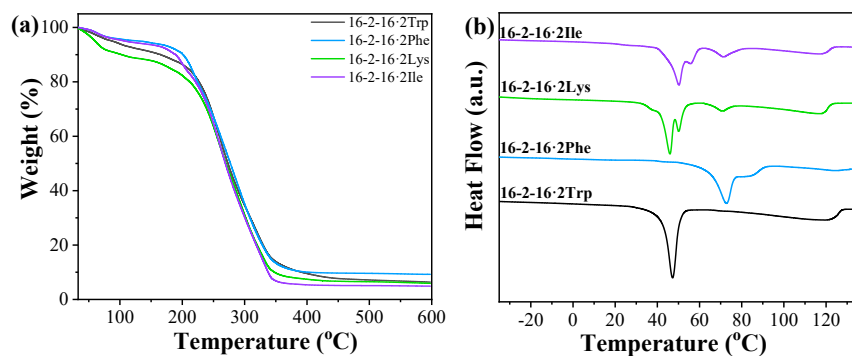

Figure S4. (a) TGA curve, and (b) DSC thermogram of luminescent complexes.

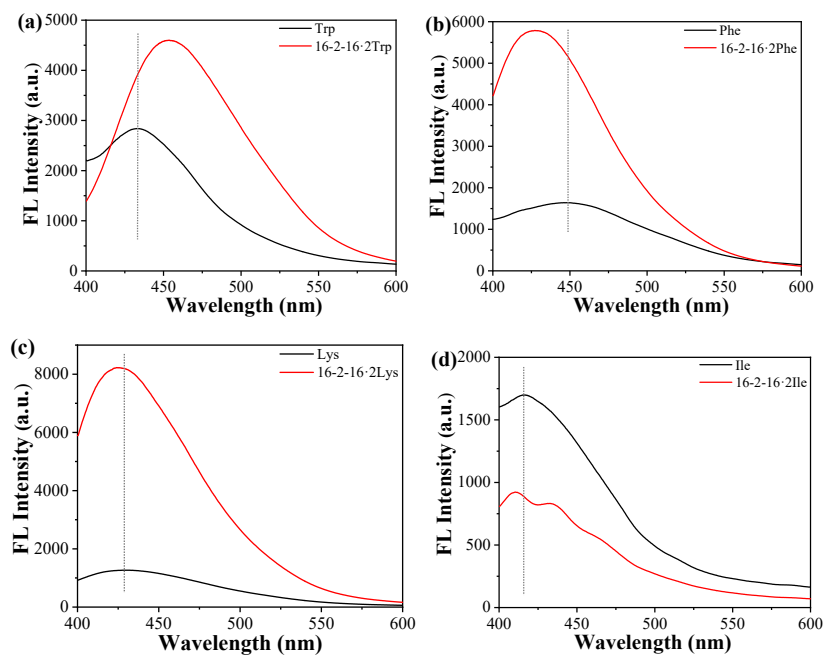

Figure S5. Fluorescent spectra of luminescent complexes and corresponding amino acids at 365 nm excitation.

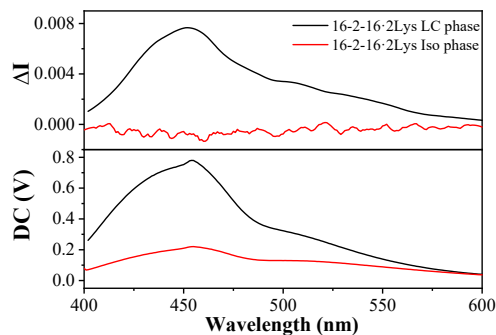

Figure S6. CPL spectra of 16-2-16·2Lys films measured at LC and Iso phases, respectively.

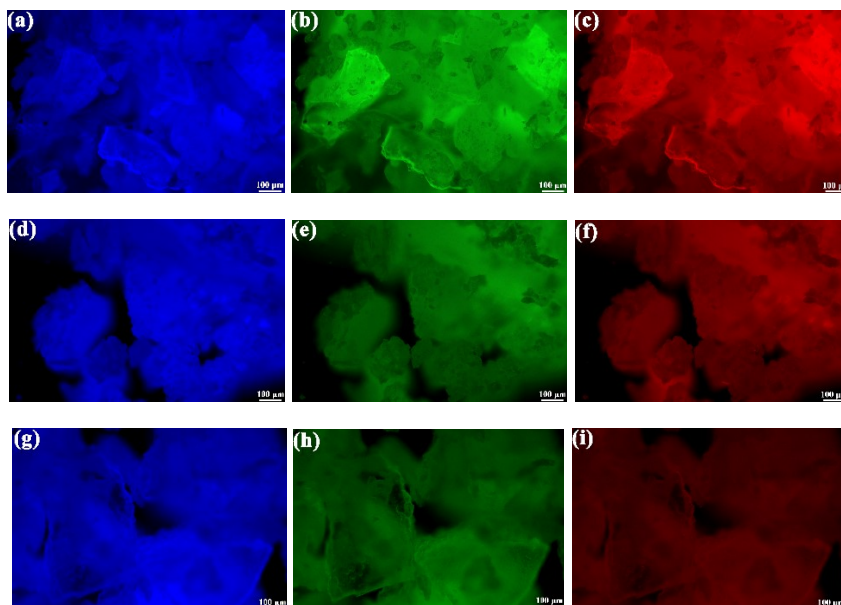

Figure S7. Microscope images of luminescent complexes (a-c) 16-2-16·2Trp, (d-f) 16-2-16·2Phe, and (g-i) 16-2-16·2Lys taken under illumination of UV (340-380 nm, left), blue (450-490 nm, middle), or green (515-560 nm, right). Scale bar: 100  $\mu\text{m}$ .

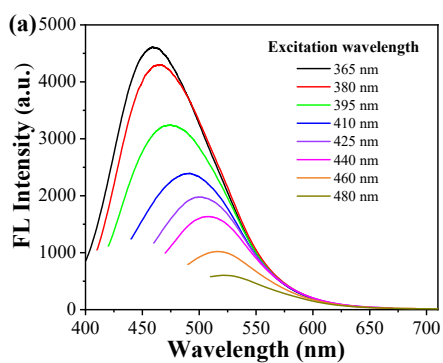

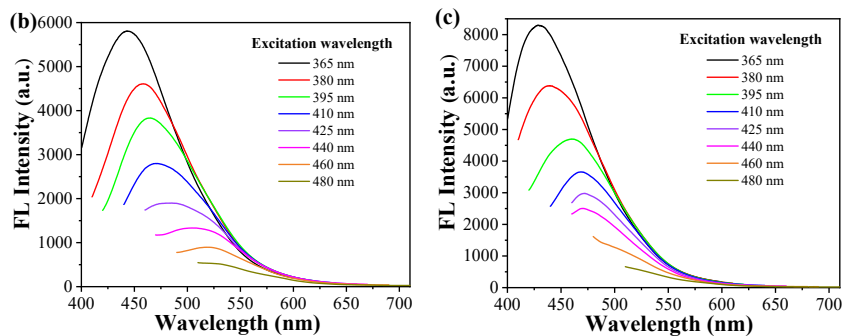

Figure S8. Excitation-dependent emission spectra of luminescent complexes (a) 16-2-16·2Trp, (b) 16-2-16·2Phe, and (c) 16-2-16·2Lys.

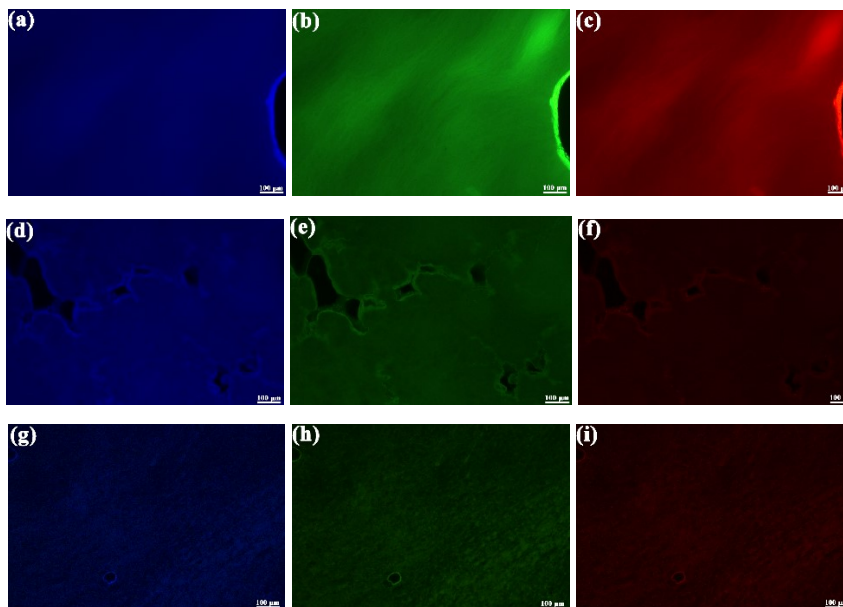

Figure S9. Microscope images of luminescent ILCs (a-c) 16-2-16·2Trp, (d-f) 16-2-16·2Phe, and (g-i) 16-2-16·2Lys taken under illumination of UV (340-380 nm, left), blue (450-490 nm, middle), or green (515-560 nm, right). Scale bar: 100  $\mu\text{m}$ .

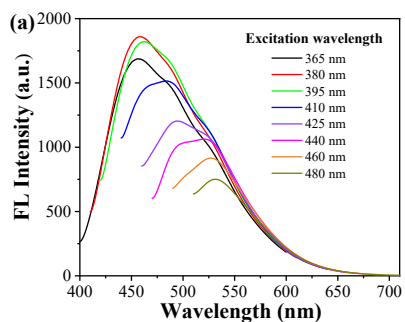

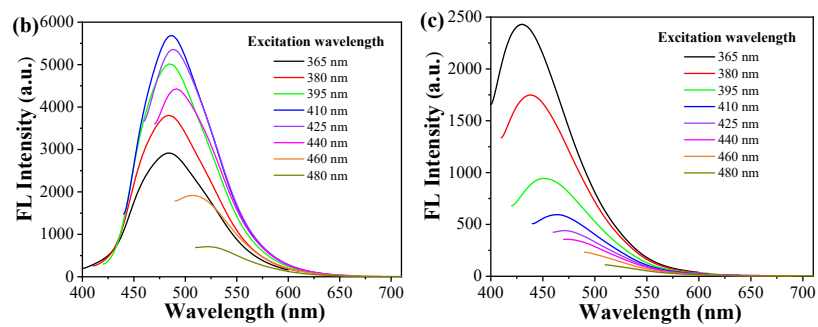

Figure S10. Excitation-dependent emission spectra of ILCs (a) 16-2-16·2Trp, (b) 16-2-16·2Phe, and (c) 16-2-16·2Lys.
